# Supplementary material for: Revealing the dominant long noncoding RNAs responding to the infection with Colletotrichum gloeosporioides in Hevea brasiliensis
Source: PubMed Central journal article supplement (PMC6466799; doi:10.1186/s13062-019-0235-z), 2019-04-15

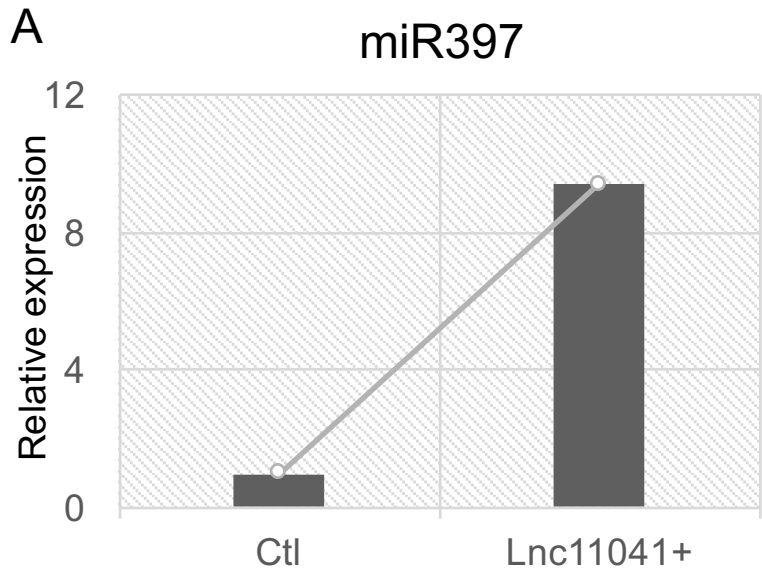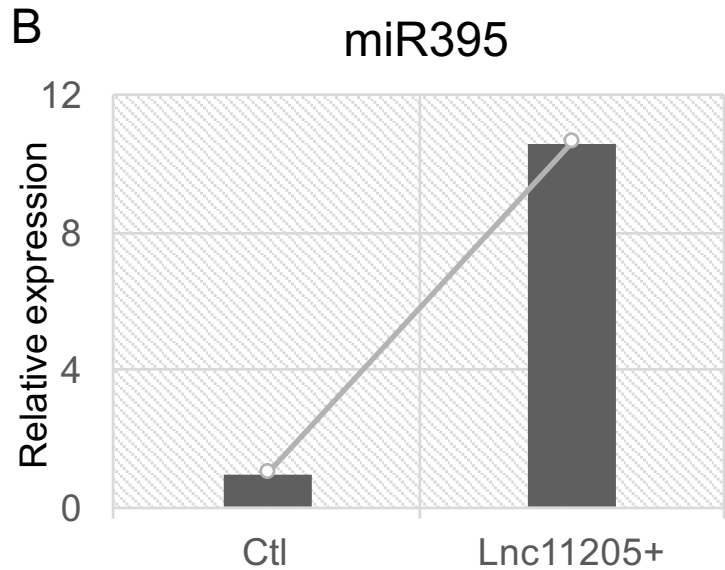

Supplement: 13062_2019_235_MOESM5_ESM.pdf [file 13062_2019_235_MOESM5_ESM.pdf]
